# Supplementary material
Source: PubMed Central journal article supplement (PMC3512043)
Supplement: mmc1.pdf [file mmc1.pdf]

# **Supporting Material for Slow, reversible, coupled folding and binding of the spectrin tetramerization domain**

S.L. Shammam\*, J.M. Rogers\*, S.A. Hill\* and J. Clarke

\*These authors contributed equally to this work

Department of Chemistry, University of Cambridge, Lensfield Rd, Cambridge CB2 1EW, UK

**Table S1** Collated equilibrium and association rate constants for protein systems where one or more partner is at least partially disordered.

| <b>Complex</b>                | <b><math>k^+</math></b><br>( $M^{-1}s^{-1}$ ) | <b><math>K_d</math></b><br>(M) | <b>Method*</b>                      | <b>Reference</b> |
|-------------------------------|-----------------------------------------------|--------------------------------|-------------------------------------|------------------|
| SH2/Y751                      | 3.34E+06                                      | 4.20E-08                       | SPR                                 | (1)              |
| SH2/pYHmT                     | 2.00E+05                                      | 1.00E-06                       | SPR                                 | (2)              |
| SH2/pY531                     | 2.00E+05                                      | 5.00E-06                       | SPR                                 | (2)              |
| SH2/ITAM                      | 4.17E+06                                      | 2.34E-09                       | Scintillation proximity-based assay | (3)              |
| Grb2-mSos1/EGFR               | 6.30E+06                                      | 3.10E-08                       | SPR                                 | (4)              |
| Grb2-mSos1/IR-PEP             | 1.05E+06                                      | 2.96E-07                       | SPR                                 | (4)              |
| BRCA1-BRCT/bBACH1-P           | 4.00E+06                                      | 5.00E-09                       | SPR                                 | (5)              |
| Cdc42/WASP                    | 1.90E+05                                      | 6.30E-08                       | SPR                                 | (6)              |
| SUA/Ecto-Tva                  | 5.60E+04                                      | 1.49E-07                       | RMB                                 | (7)              |
| CaM/CKII                      | 1.30E+08                                      | 2.00E-09                       | SF                                  | (8)              |
| ToIA/ColIN                    | 5.00E+04                                      | 8.30E-07                       | SPR                                 | (9)              |
| ToIA/ColIN                    | 1.10E+05                                      | 1.00E-07                       | SF                                  | (10)             |
| TCR/pMHC                      | 3.72E+04                                      | 5.90E-06                       | SPR                                 | (11)             |
| S-peptide/S-protein           | 1.80E+07                                      | 6.00E-12                       | SF                                  | (12)             |
| Sky/ $\beta_1$                | 1.90E+04                                      | 7.10E-08                       | SPR                                 | (13)             |
| Sky/ $\beta_2$                | 3.80E+04                                      | 3.80E-08                       | SPR                                 | (13)             |
| Sky/ $\beta_3$                | 4.80E+04                                      | 2.40E-08                       | SPR                                 | (13)             |
| HIF/TAZ1                      | 1.29E+09                                      | 1.43E-07                       | NMR                                 | (14)             |
| GCN4 D7A                      | 8.00E+06                                      | 1.90E-10                       | SF                                  | (15)             |
| UbF45W                        | 3.10E+03                                      | 2.20E-07                       | SF                                  | (15)             |
| GCN4                          | 3.00E+08                                      | 2.40E-10                       | SF                                  | (16)             |
| GCN4-p1                       | 2.75E+06                                      | 5.60E-08                       | SF                                  | (17)             |
| GCN4                          | 6.63E+05                                      | 2.60E-07                       | SF                                  | (18)             |
| Leucine zipper                | 4.00E+06                                      | 2.50E-06                       | SF                                  | (19)             |
| KIX/pKID                      | 1.30E+02                                      | 1.08E-05                       | QCM                                 | (20)             |
| KIX/KID                       | 1.20E+02                                      | 2.08E-04                       | QCM                                 | (20)             |
| MICA/NKG2D                    | 7.50E+03                                      | 1.70E-06                       | SPR                                 | (21)             |
| AR-AF1/SRC-1                  | 2.40E+02                                      | 1.40E-05                       | SPR                                 | (22)             |
| AR-AF1/RAP74-NTD              | 4.60E+03                                      | 6.30E-07                       | SPR                                 | (22)             |
| E6/GST-E6AP                   | 7.13E+04                                      | 2.59E-06                       | SPR                                 | (23)             |
| E6/MBP-E6AP                   | 5.42E+04                                      | 5.26E-06                       | SPR                                 | (23)             |
| MEM-265/peptide               | 2.74E+05                                      | 2.10E-09                       | SPR                                 | (24)             |
| MDM2/p53                      | 9.20E+06                                      | 2.20E-07                       | SF                                  | (24)             |
| Imp $\alpha$ /NLS             | 2.00E+04                                      | 1.55E-08                       | SPR                                 | (25)             |
| D-KQTSV/PSD-95PDZ3            | 7.90E+06                                      | 8.00E-07                       | SF                                  | (26)             |
| ToIB/Pal                      | 7.60E+04                                      | 5.00E-08                       | SF                                  | (27)             |
| ToIB/TBE $\rho$               | 1.75E+05                                      | 6.20E-06                       | SF                                  | (27)             |
| NOS PDZ/PSD-95 PDZ 2          | 4.00E+05                                      | 4.00E-06                       | SF                                  | (28)             |
| S-peptide/S-protein           | 4.40E+05                                      | 2.80E-07                       | SF                                  | (29)             |
| PEP-19/apo-CaM                | 1.00E+06                                      | 1.30E-05                       | SF                                  | (30)             |
| HIF-OH/TAZ1                   | 1.29E+09                                      | 1.43E-07                       | NMR                                 | (14)             |
| E-cadherin/ $\beta$ -catenin  | 3.56E+05                                      | 4.60E-08                       | SPR                                 | (31)             |
| pE-cadherin/ $\beta$ -catenin | 4.49E+06                                      | 5.20E-11                       | SPR                                 | (31)             |
| HPV16 E716-31/ RbAB           | 3.44E+07                                      | 5.10E-09                       | SF                                  | (32)             |
| MICA/NKG2D                    | 7.50E+03                                      | 1.73E-06                       | SPR                                 | (21)             |
| TAZ2/p53 AD2                  | 1.70E+10                                      | 3.20E-08                       | NMR                                 | (34)             |

|                |          |          |                          |      |
|----------------|----------|----------|--------------------------|------|
| GCN4-p1        | 4.20E+05 | 3.30E-08 | CD SF                    | (35) |
| ROP            | 1.80E+06 | 4.02E-13 | CD                       | (36) |
| hFoB           | 8.10E+03 | 6.59E-05 | SF                       | (37) |
| hPyA1          | 9.00E+05 | 1.55E-12 | SF                       | (37) |
| Arc repressor  | 9.00E+06 | 7.88E-09 | SF                       | (38) |
| CopG (Y39W)    | ND       | 1.48E-10 | CD                       | (39) |
| ORF56h         | 7.00E+07 | 3.00E-15 | SF                       | (40) |
| Gene V protein | 1.10E+07 | 1.11E-12 | CD manual mixing         | (41) |
| HIV-1 protease | ND       | 3.84E-11 | equilibrium denaturation | (42) |
| SIV-1 protease | ND       | 1.76E-10 | equilibrium denaturation | (42) |

\*SPR: surface plasmon resonance, RMB: resonant mirror biosensor, SF: stopped-flow technique,

QCM: quartz crystal microbalance, NMR: nuclear magnetic resonance, CD: circular dichroism,

ND: not determined.

**Table S2** Collated equilibrium and association rate constants for protein systems where both partners are structured prior to binding

| Complex                   | $k^+$<br>( $M^{-1}s^{-1}$ ) | $K_d$<br>(M) | Method*           | Reference |
|---------------------------|-----------------------------|--------------|-------------------|-----------|
| IgG/anti-IgG              | 5.25E+06                    | 1.50E-08     | FCS               | (43)      |
| BPTI/trypsin              | 9.90E+05                    | 5.00E-14     | Enzymatic studies | (44)      |
| BPTI/chymotrypsin         | 1.70E+05                    | 1.10E-08     | Enzymatic studies | (44)      |
| E225/D1.3                 | 1.00E+03                    | 3.60E-07     | SPR               | (45)      |
| FVIIa/sTF                 | 3.40E+05                    | 6.30E-09     | SPR               | (46)      |
| hIL5/shIL5R $\alpha$ -Fc  | 4.90E+05                    | 7.60E-09     | SPR               | (47)      |
| hGH/hGPbp                 | 3.00E+05                    | 9.00E-10     | SPR               | (48)      |
| sCD4/gp120                | 8.30E+04                    | 1.90E-08     | SPR               | (49)      |
| CD4/gp120                 | 6.72E+04                    | 2.20E-08     | SPR               | (50)      |
| g5p/Trx-(SH) <sub>2</sub> | 4.70E+04                    | 2.20E-09     | SPR               | (51)      |
| Cytochrome <i>c</i> /2B5  | 6.50E+05                    | 1.20E-10     | SF                | (52)      |
| Cytochrome <i>c</i> /5F8  | 1.50E+06                    | 6.70E-11     | SF                | (52)      |
| SUA-rlgG/Ecto-Tva         | 2.76E+05                    | 1.64E-08     | RMB               | (7)       |
| Ial/trypsin (human)       | 1.10E+07                    | 6.40E-08     | Enzymatic studies | (53)      |
| Ial/chymotrypsin (bovine) | 2.20E+05                    | 2.40E-09     | Enzymatic studies | (53)      |
| AMY2/BASI                 | 1.19E+05                    | 1.70E-09     | SPR               | (54)      |
| Myosin/CaM                | 4.60E+07                    | 2.20E-08     | SF                | (55)      |
| HEL/VL::VH-MalE           | 7.84E+04                    | 8.46E-09     | SPR               | (56)      |
| HEL/VH::VL-MalE           | 8.66E+04                    | 8.96E-09     | SPR               | (56)      |
| Barstar/barnase           | 6.00E+08                    | 1.30E-14     | SF                | (57)      |
| B-CheZ/CheY               | 5.64E+06                    | 7.10E-09     | SF                | (58)      |
| HyHEL/BWQL                | 1.80E+07                    | 5.30E-08     | SF                | (59)      |
| PI3-K/IGF-1R              | 4.83E+05                    | 4.40E-09     | SPR               | (60)      |
| GroEL/GroES               | 8.00E+05                    | 1.40E-08     | SPR               | (61)      |
| smGN/CaM                  | 1.24E+06                    | 4.42E-09     | SPR               | (62)      |
| BoNT/scFv                 | 2.09E+06                    | 4.51E-11     | SPR               | (63)      |
| Palivizumab/Fab           | 1.26E+05                    | 5.25E-09     | SPR               | (64)      |
| Palivizumab/IgG           | 1.27E+05                    | 3.39E-09     | SPR               | (64)      |
| Fyn SH3/PRD1              | 7.70E+04                    | 5.20E-06     | SPR               | (65)      |
| AChR/Fyn SH2              | 4.20E+03                    | 1.90E-09     | RBA               | (66)      |
| AChR/Fyk SH2              | 6.20E+03                    | 1.30E-09     | RBA               | (66)      |
| IgG/protein A/G           | 4.26E+05                    | 1.13E-10     | SPR               | (67)      |
| AR-AF1/RAP74              | 2.00E+04                    | 1.70E-07     | SPR               | (22)      |
| p53/NPM                   | 4.30E+03                    | 3.14E-07     | SPR               | (68)      |
| Ras/Raf-RBD               | 3.55E+07                    | 5.00E-08     | SF                | (69)      |
| Stathmin/tubulin          | 8.90E+03                    | 5.60E-07     | SPR               | (70)      |
| IL5/sIL5R $\alpha$        | 2.40E+06                    | 3.10E-09     | SPR               | (71)      |
| IgG/CGRP $\alpha$ (human) | 1.16E+05                    | 5.78E-09     | SPR               | (72)      |
| hPRLr-ECD/hPRL            | 1.40E+05                    | 4.40E-09     | SPR               | (73)      |
| hPRLr-ECD/hGH             | 3.58E+04                    | 6.70E-09     | SPR               | (73)      |
| IGF-II/IGF2R              | 6.62E+05                    | 1.19E-07     | SPR               | (74)      |
| BLIP/TEM-1                | 2.40E+05                    | 7.00E-10     | SPR               | (75)      |
| AF6 RA1/Ras               | 6.40E+06                    | 2.40E-06     | SF                | (76)      |
| CD81LEL-GST/HCV           | 8.90E+03                    | 5.20E-08     | SPR               | (77)      |
| CopY/ <i>cop</i> promoter | 4.30E+04                    | 1.70E-10     | SPR               | (78)      |
| actin gelsolin            | 2.50E+04                    | ND           | Fluorescence      | (79)      |

|                                        |          |          |                                                 |       |
|----------------------------------------|----------|----------|-------------------------------------------------|-------|
| MMP1/TIMP1 $\Delta$ C                  | 5.20E+04 | 2.11E-09 | SPR                                             | (80)  |
| casein kinase II b chain/ a chain      | 6.65E+04 | 5.41E-09 | SPR                                             | (81)  |
| ACE2 receptor/SARS spike protein       | 7.12E+04 | 1.62E-08 | SPR                                             | (82)  |
| Ad12/coxsackie and adenovirus receptor | 7.31E+04 | 1.50E-08 | SPR                                             | (83)  |
| shark IgNAR/lysozyme                   | 9.00E+04 | 1.00E-09 | SPR                                             | (84)  |
| CR2/ Staphylococcus enterotoxin B      | 1.00E+05 | 1.40E-04 | SPR                                             | (85)  |
| anthrax protective antigen/CMG2        | 1.10E+05 | 7.80E-10 | SF FRET                                         | (86)  |
| Fab/ flu virus hemagglutinin           | 1.10E+05 | 1.00E-09 | SPR for $k^+$ , ELISA for $K_d$                 | (87)  |
| HPrK/P/HPR                             | 1.30E+05 | 4.50E-08 | SPR                                             | (88)  |
| ICAM-1/integrin $\alpha$ L domain      | 1.33E+05 | 3.00E-06 | SPR                                             | (89)  |
| MHC class1 HLA-A2/CD8                  | 1.40E+05 | 1.26E-04 | SPR                                             | (90)  |
| proMMP2/TIMP-2                         | 1.40E+05 | 5.20E-09 | SPR                                             | (91)  |
| TIMP-1/MMP3                            | 2.00E+05 | 6.30E-10 | SPR                                             | (80)  |
| camel VHH/pancreatic $\alpha$ -amylase | 2.40E+05 | 3.50E-09 | SPR                                             | (92)  |
| Fab/HIV-1 capsid protein p24           | 3.50E+05 | 2.90E-08 | SPR                                             | (93)  |
| xylanase/inhibitor                     | 3.60E+05 | 1.07E-09 | SPR                                             | (94)  |
| CD2/CD58                               | 4.00E+05 | 1.55E-05 | SPR                                             | (95)  |
| IgG1 Fc/FcgRIII                        | 5.40E+05 | 1.80E-06 | SPR                                             | (96)  |
| HIV-1 integrase/ p75                   | 4.80E+05 | 1.09E-08 | FRET                                            | (97)  |
| albumin/albumin-binding protein        | 5.50E+05 | 1.20E-09 | SPR                                             | (98)  |
| TGFb/TGFb receptor                     | 7.40E+05 | 7.30E-08 | SPR                                             | (99)  |
| $\alpha$ -chymotrypsin/LCMI II         | 8.00E+05 | 2.00E-10 | Enzymatic studies                               | (100) |
| chymotrypsin/ecotin                    | 8.90E+05 | 3.00E-12 | Enzymatic studies                               | (101) |
| Fab D3H44/tissue factor                | 9.80E+05 | 1.00E-10 | SPR                                             | (102) |
| Mlc transcription regulator/ EIICB     | 9.95E+05 | 4.14E-09 | SPR                                             | (103) |
| streptogrisin B/OMTKY3                 | 1.20E+06 | ND       | Enzymatic studies                               | (104) |
| Fv D1.3 /HEW lysozyme                  | 1.40E+06 | 3.70E-09 | SF for $k^+$ , fluorescence titration for $K_d$ | (105) |
| Ga <sub>i1</sub> /RGS4                 | 1.70E+06 | ND       | SF                                              | (106) |
| elastase/elafin                        | 3.60E+06 | 1.70E-10 | Enzymatic studies                               | (107) |
| b actin/profilin                       | 6.60E+06 | 4.80E-07 | SF                                              | (108) |
| AchE/fasciculon-II                     | 1.50E+07 | ND       | Enzymatic studies                               | (109) |
| streptokinase/plasmin                  | 5.40E+07 | 5.00E-11 | SF                                              | (110) |
| CheY/CheA                              | 5.60E+06 | 4.00E-06 | SF                                              | (111) |
| cytochrome f/plastocynin               | 1.80E+08 | ND       | SF                                              | (112) |
| $\lambda$ Cro (F58W)                   | 1.9E+04  | 4.92E-09 | FRET manual mixing                              | (113) |
| CcdB                                   | ND       | 4.4E-17  | Equilibrium denaturation                        | (114) |
| Tctex-1                                | ND       | 3E-15    | Equilibrium denaturation                        | (115) |

\* FCS: fluorescence correlation spectroscopy, SPR: surface plasmon resonance, SF: stopped-flow technique, RMB: resonant mirror biosensor, RBA: radioligand binding assay, FRET: fluorescence resonance energy transfer, ELISA: enzyme-linked immunosorbent assay, ND: not determined.0

## Outline of the kinetic schemes used for analysis of protein-protein interactions:

Considering the two-state bimolecular reaction,  $A + B \xrightleftharpoons[k-]{k+} AB$  (scheme 2 in main text), where the association rate constant is  $k+$  (in  $M^{-1}s^{-1}$ ), the dissociation rate constant is  $k-$  (in  $s^{-1}$ ) and the dissociation constant  $K_d$  is identified as  $k-/k+$  (in  $M$ ).

### (A) Irreversible schemes

#### (i) Equimolar association and dissociation

In some cases, appropriate conditions may be found so that the  $K_d$  is very low compared with the protein concentration, making a 1:1 molar association reaction essentially irreversible. Such cases are described by a kinetic scheme  $A + B \xrightarrow{k+} AB$  (scheme 1 in main text), which allows kinetic traces to be fit to Eq. 2 in Materials and Methods (57, 116, 117). Similarly, conditions, such as high denaturant concentration, may be found so that the equilibrium constant is much higher than the employed protein concentration, and therefore the dissociation reaction is essentially irreversible, allowing kinetic traces to be fit to Eq. 7. For example, protein solutions may be rapidly mixed with a series of denaturant solutions at a variety of concentrations. The empirical linear variation of  $\ln(k-)$  with denaturant can then be used to estimate  $k-$  in appropriate solvent conditions (12). Inherently the irreversible approach is likely to result in ‘gaps’ where neither association nor dissociation can be modelled as irreversible, such as intermediate denaturant concentrations (118), where the dominant process switches from folding/association to unfolding/dissociation. An elegant method to estimate dissociation rate constants under conditions where association is strongly favoured, is to dilute (radio- or dye-) labelled complexed subunits into an excess of unlabelled subunits so that dissociation of labelled complex is nonetheless irreversible, and identify the ‘off’ rate constant as the dissociation rate constant (12, 57). As well as being practically challenging, extraction of the equilibrium properties in this manner assumes that the presence of the label does not alter the rate constants, and therefore complex stability.

#### (ii) Pseudo-first order studies

The most common approach for obtaining association rate constants is the creation of pseudo-first order conditions by providing an excess (typically described as above five-fold) of one or other of the components (12, 119-121). In this case the association constant may be extracted by simply dividing the observed rate constant by the concentration of the excess species, assumed to be constant. This approach is arguably the most accurate way to estimate association rate constants, as accurate concentration determination of only one reactant is required and, where measurements are

made for a number of protein ratios the estimate is averaged, reducing errors. Other notable consequences of having one species in excess are that the equilibrium is shifted towards the bound state, assisting in the creation of essentially irreversible association reactions, and, lower overall concentrations are required to reach non-diffusion limited regimes, where mechanistic information about conformational changes may be inferred (122).

In principle the pseudo first order method is also capable of taking into account a significant back reaction during association kinetics and give estimates of the dissociation rate constant. Since  $k_{\text{obs}} = k_+[A] + k_-$ , where  $[A]$  is the concentration of the excess reagent, if measurements are performed for various  $[A]$ , a straight line fit can be used to extrapolate to  $[A]=0$ , where  $k_{\text{obs}}=k_-$ . However, typically  $k_-$  is small relative to  $k_+$ , so that the large required extrapolation provides a very poor estimate of the off rate (29). For this reason,  $k_-$  is commonly measured using an alternative technique, such as the out-competition of bound protein using an excess of unlabelled protein (12), or, by assuming that complex formation is a two-state reaction,, calculate  $k_-$  given a pre-determined  $K_d$  (29).

## **(B) Reversible schemes**

### **(i) Concentration dependence of apparent rate constants**

Recently, equations describing the expected concentration dependence of apparent rate constants in the reversible regime (123) have been used to extract both association and dissociation rate constants for PDZ domain ligand binding (26, 124). This method can be used even if kinetic data are fairly poorly sampled, where only a single exponential fit can be justified. An inherently similar approach is used in relaxation rate analysis, where only small changes are made to the equilibrium, so that the reaction is well described by a single exponential with an apparent rate constant that has a known dependence on the concentration of reactants (125).

### **(ii) Direct fitting of kinetic traces**

It is possible to fit individual kinetic traces by simple numerical integration of rate equations, and this approach has been used previously (35). However, this provides little insight into the process itself, and is more computationally expensive than an analytical approach, especially where data sampling is extensive enough to provide accurate estimates. An analytical solution to the reversible scheme has already been reported and successfully used for the study of a reversible homodimer association by Milla et al. (126). A similar equation has been used by Wendt et al (127) to describe the association of leucine zippers, a heterodimeric system, following 1:1 mixing of the two subunits.

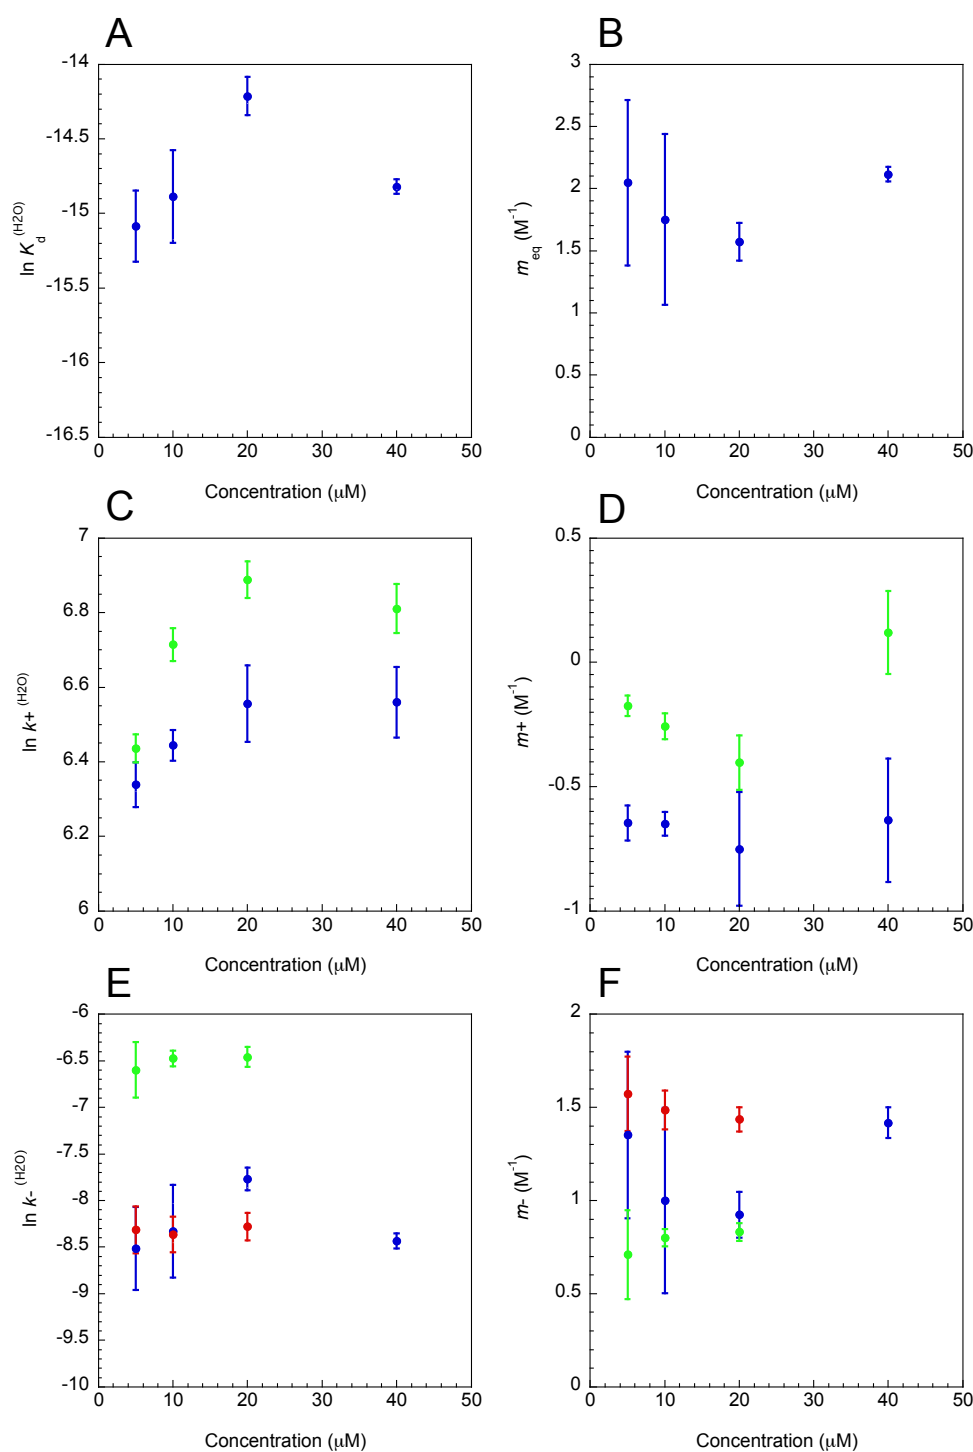

**Figure S1** Concentration dependence of fitted rate and equilibrium constants, and their dependence upon denaturant concentration. Values for  $K_d^{(\text{H}_2\text{O})}$  (A) and  $k_+^{(\text{H}_2\text{O})}$  (C) were estimated using the y-axis intercepts and  $m_{\text{eq}}$  (B) and  $m_+$  (D) using the slopes, of the linear fits plotted in Fig. 5 B and Fig. 5 A, respectively (solid blue circles) or their equivalents for the irreversible model fits (solid green circles). Values for  $k_-^{(\text{H}_2\text{O})}$  (E) and  $m_-$  (F) were obtained using the y-axis intercepts and gradients, respectively, of the linear fits plotted in Fig 5 C for folding (solid blue circles) and unfolding (solid red circles), and in Fig. 5 D for unfolding traces fit with the irreversible model (solid green circles).



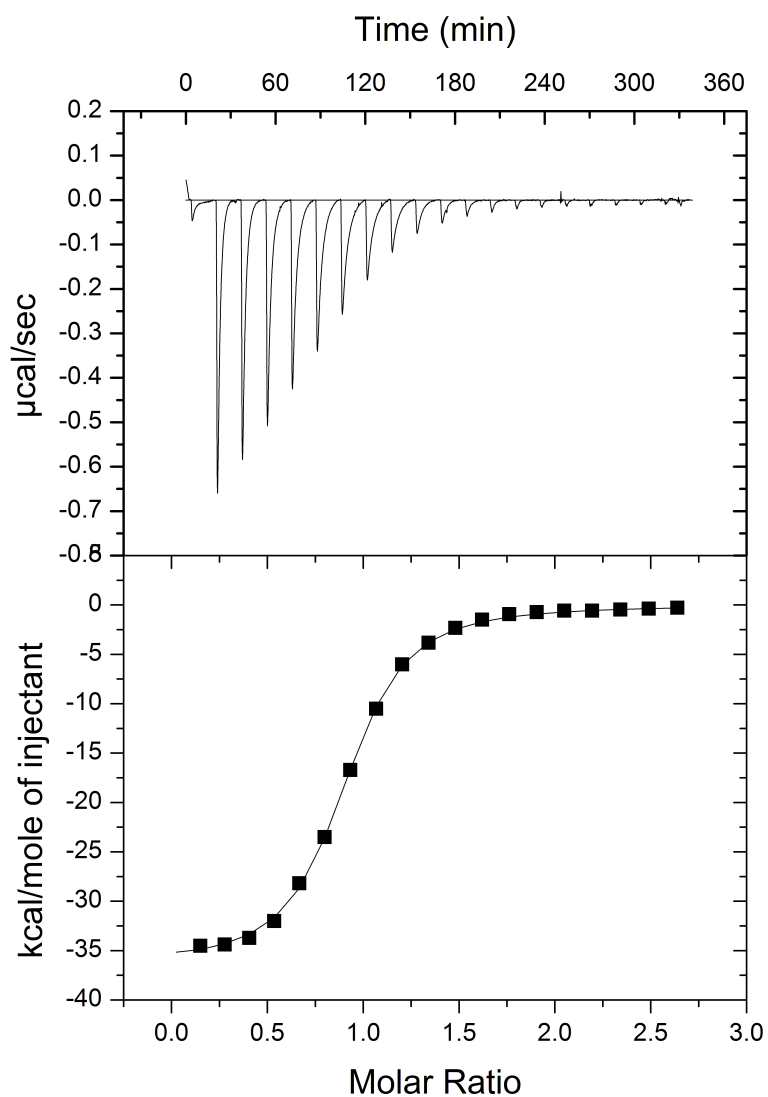

**Figure S2** Representative ITC measurement for the titration of  $\alpha 0\alpha 1$  (193  $\mu\text{M}$ ) into  $\beta 16\beta 17$  (16.3  $\mu\text{M}$ ) at 25  $^{\circ}\text{C}$ . (Upper) Injection profile (Lower) Calorimetric binding isotherm. The curve through the points represents the best fit to the data using the independent binding model (MicroCal software.)

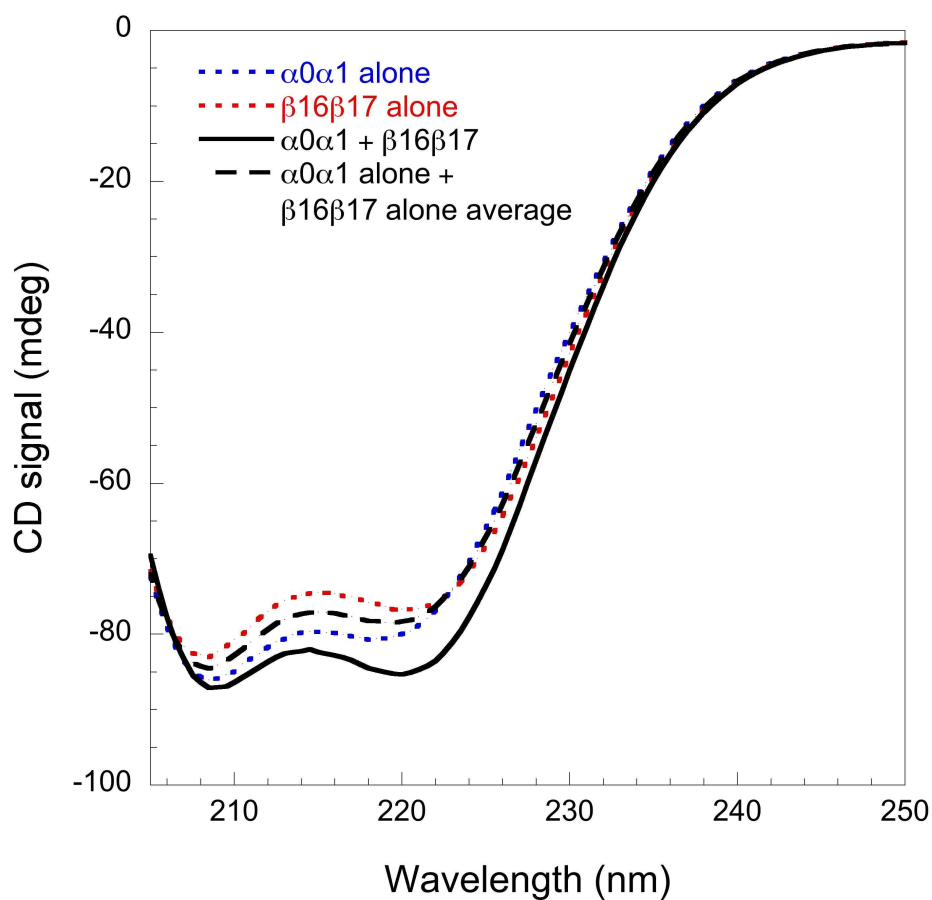

**Figure S3** CD spectra demonstrate an increase in helicity on association: Far UV circular dichroism spectra of constructs  $\alpha 0 \alpha 1$  alone,  $\beta 16 \beta 17$  alone, and  $\alpha 0 \alpha 1 + \beta 16 \beta 17$  together. The average of the two scans of the constructs alone is shown for comparison. This represents the expected spectrum for the mixture in the absence of an interaction. An increase in CD signal is observed due to the formation of the ‘tetramerization domain’. Note that the tetramerization domain forms in the presence of two fully folded spectrin domains ( $\alpha 1$  and  $\beta 16$ ) whose helical CD spectrum presumably do not change upon association.

## SUPPORTING REFERENCES

1. Panayotou, G., G. Gish, P. End, O. Truong, I. Gout, R. Dhand, M. J. Fry, I. Hiles, T. Pawson, and M. D. Waterfield. 1993. Interactions between SH2 domains and tyrosine-phosphorylated platelet-derived growth factor beta-receptor sequences: analysis of kinetic parameters by a novel biosensor-based approach. *Mol. Cell. Biol.* 13:3567-3576.
2. Ladbury, J. E., M. Hensmann, G. Panayotou, and I. D. Campbell. 1996. Alternative modes of tyrosyl phosphopeptide binding to a Src family SH2 domain: implications for regulation of tyrosine kinase activity. *Biochemistry.* 35:11062-11069.
3. Chen, T., B. Repetto, R. Chizzonite, C. Pullar, C. Burghardt, E. Dharm, Z. Zhao, R. Carroll, P. Nunes, M. Basu, W. Danho, M. Visnick, J. Kochan, D. Waugh, and A. M. Gilfillan. 1996. Interaction of phosphorylated FcepsilonRIgamma immunoglobulin receptor tyrosine activation motif-based peptides with dual and single SH2 domains of p72syk. Assessment of binding parameters and real time binding kinetics. *J. Biol. Chem.* 271:25308-25315.
4. Chook, Y. M., G. D. Gish, C. M. Kay, E. F. Pai, and T. Pawson. 1996. The Grb2-mSos1 complex binds phosphopeptides with higher affinity than Grb2. *J. Biol. Chem.* 271:30472-30478.
5. Nomine, Y., M. V. Botuyan, Z. Bajzer, W. G. Owen, A. J. Caride, E. Wasielewski, and G. Mer. 2008. Kinetic analysis of interaction of BRCA1 tandem breast cancer c-terminal domains with phosphorylated peptides reveals two binding conformations. *Biochemistry.* 47:9866-9879.
6. Rudolph, M. G., P. Bayer, A. Abo, J. Kuhlmann, I. R. Vetter, and A. Wittinghofer. 1998. The Cdc42/Rac interactive binding region motif of the Wiskott Aldrich syndrome protein (WASP) is necessary but not sufficient for tight binding to Cdc42 and structure formation. *J. Biol. Chem.* 273:18067-18076.
7. Yu, X., Q. Y. Wang, Y. Guo, K. Dolmer, J. A. Young, P. G. Gettins, and L. Rong. 2003. Kinetic analysis of binding interaction between the subgroup A Rous sarcoma virus glycoprotein SU and its cognate receptor Tva: calcium is not required for ligand binding. *J. Virol.* 77:7517-7526.
8. Waxham, M. N., A. L. Tsai, and J. A. Putkey. 1998. A mechanism for calmodulin (CaM) trapping by CaM-kinase II defined by a family of CaM-binding peptides. *J. Biol. Chem.* 273:17579-17584.
9. Anderluh, G., I. Gokce, and J. H. Lakey. 2004. A natively unfolded toxin domain uses its receptor as a folding template. *J. Biol. Chem.* 279:22002-22009.
10. Anderluh, G., Q. Hong, R. Boetzel, C. MacDonald, G. R. Moore, R. Virden, and J. H. Lakey. 2003. Concerted folding and binding of a flexible colicin domain to its periplasmic receptor TolA. *J. Biol. Chem.* 278:21860-21868.
11. Garcia, K. C., C. G. Radu, J. Ho, R. J. Ober, and E. S. Ward. 2001. Kinetics and thermodynamics of T cell receptor- autoantigen interactions in murine experimental autoimmune encephalomyelitis. *Proc. Natl. Acad. Sci. USA.* 98:6818-6823.
12. Goldberg, J. M., and R. L. Baldwin. 1998. Kinetic mechanism of a partial folding reaction. 1. Properties of the reaction and effects of denaturants. *Biochemistry.* 37:2546-2555.
13. Woodside, D. G., A. Obergfell, A. Talapatra, D. A. Calderwood, S. J. Shattil, and M. H. Ginsberg. 2002. The N-terminal SH2 domains of Syk and ZAP-70 mediate phosphotyrosine-independent binding to integrin beta cytoplasmic domains. *J. Biol. Chem.* 277:39401-39408.
14. Sugase, K., J. C. Lansing, H. J. Dyson, and P. E. Wright. 2007. Tailoring relaxation dispersion experiments for fast-associating protein complexes. *J. Am. Chem. Soc.* 129:13406-13407.
15. Krantz, B. A., L. B. Moran, A. Kentsis, and T. R. Sosnick. 2000. D/H amide kinetic isotope effects reveal when hydrogen bonds form during protein folding. *Nat. Struct. Biol.* 7:62-71.
16. Durr, E., I. Jelesarov, and H. R. Bosshard. 1999. Extremely fast folding of a very stable

- leucine zipper with a strengthened hydrophobic core and lacking electrostatic interactions between helices. *Biochemistry*. 38:870-880.
17. Ibarra-Molero, B., G. I. Makhatadze, and C. R. Matthews. 2001. Mapping the energy surface for the folding reaction of the coiled-coil peptide GCN4-p1. *Biochemistry*. 40:719-731.
  18. Steinmetz, M. O., I. Jelesarov, W. M. Matousek, S. Honnappa, W. Jahnke, J. H. Missimer, S. Frank, A. T. Alexandrescu, and R. A. Kammerer. 2007. Molecular basis of coiled-coil formation. *Proc. Natl. Acad. Sci. USA*. 104:7062-7067.
  19. Wendt, H., C. Berger, A. Baici, R. M. Thomas, and H. R. Bosshard. 1995. Kinetics of folding of leucine zipper domains. *Biochemistry*. 34:4097-4107.
  20. Matsuno, H., H. Furusawa, and Y. Okahata. 2004. Kinetic study of phosphorylation-dependent complex formation between the kinase-inducible domain (KID) of CREB and the KIX domain of CBP on a quartz crystal microbalance. *Chemistry*. 10:6172-6178.
  21. Lengyel, C. S., L. J. Willis, P. Mann, D. Baker, T. Kortemme, R. K. Strong, and B. J. McFarland. 2007. Mutations designed to destabilize the receptor-bound conformation increase MICA-NKG2D association rate and affinity. *J. Biol. Chem*. 282:30658-30666.
  22. Lavery, D. N., and I. J. McEwan. 2008. Functional characterization of the native NH<sub>2</sub>-terminal transactivation domain of the human androgen receptor: binding kinetics for interactions with TFIIF and SRC-1a. *Biochemistry*. 47:3352-3359.
  23. Zanier, K., S. Charbonnier, M. Baltzinger, Y. Nomine, D. Altschuh, and G. Trave. 2005. Kinetic analysis of the interactions of human papillomavirus E6 oncoproteins with the ubiquitin ligase E6AP using surface plasmon resonance. *J. Mol. Biol*. 349:401-412.
  24. Schon, O., A. Friedler, M. Bycroft, S. M. Freund, and A. R. Fersht. 2002. Molecular mechanism of the interaction between MDM2 and p53. *J. Mol. Biol*. 323:491-501.
  25. Catimel, B., T. Teh, M. R. Fontes, I. G. Jennings, D. A. Jans, G. J. Howlett, E. C. Nice, and B. Kobe. 2001. Biophysical characterization of interactions involving importin- $\alpha$  during nuclear import. *J. Biol. Chem*. 276:34189-34198.
  26. Gianni, S., A. Engstrom, M. Larsson, N. Calosci, F. Malatesta, L. Eklund, C. C. Ngang, C. Travaglini-Allocatelli, and P. Jemth. 2005. The kinetics of PDZ domain-ligand interactions and implications for the binding mechanism. *J. Biol. Chem*. 280:34805-34812.
  27. Papadakos, G., N. G. Housden, K. J. Lilly, R. Kaminska, and C. Kleanthous. 2012. Kinetic basis for the competitive recruitment of TolB by the intrinsically disordered translocation domain of colicin E9. *J. Mol. Biol*. 418:269-280.
  28. Karlsson, O. A., C. N. Chi, A. Engstrom, and P. Jemth. 2012. The transition state of coupled folding and binding for a flexible beta-finger. *J. Mol. Biol*. 417:253-261.
  29. Bachmann, A., D. Wildemann, F. Praetorius, G. Fischer, and T. Kiefhaber. 2011. Mapping backbone and side-chain interactions in the transition state of a coupled protein folding and binding reaction. *Proc. Natl. Acad. Sci. USA*. 108:3952-3957.
  30. Kleerekoper, Q. K., and J. A. Putkey. 2009. PEP-19, an intrinsically disordered regulator of calmodulin signaling. *J. Biol. Chem*. 284:7455-7464.
  31. Choi, H. J., A. H. Huber, and W. I. Weis. 2006. Thermodynamics of beta-catenin-ligand interactions: the roles of the N- and C-terminal tails in modulating binding affinity. *J. Biol. Chem*. 281:1027-1038.
  32. Chemes, L. B., I. E. Sanchez, and G. de Prat-Gay. 2011. Kinetic recognition of the retinoblastoma tumor suppressor by a specific protein target. *J. Mol. Biol*. 412:267-284.
  33. Reference deleted in proof
  34. Arai, M., J. C. Ferreón, and P. E. Wright. 2012. Quantitative Analysis of Multisite Protein-Ligand Interactions by NMR: Binding of Intrinsically Disordered p53 Transactivation Subdomains with the TAZ2 Domain of CBP. *J. Am. Chem. Soc*. 134:3792-3803.
  35. Zitzewitz, J. a., O. Bilsel, J. B. Luo, B. E. Jones, and C. R. Matthews. 1995. Probing the Folding Mechanism of a Leucine-Zipper Peptide by Stopped-Flow Circular-Dichroism Spectroscopy. *Biochemistry*. 34:12812-12819.

36. Rosengarth, A., J. Rosgen, and H. J. Hinz. 1999. Slow unfolding and refolding kinetics of the mesophilic Rop wild-type protein in the transition range. *Eur. J. Biochem.* 264:989-995.
37. Topping, T. B., and L. M. Gloss. 2004. Stability and folding mechanism of mesophilic, thermophilic and hyperthermophilic archaeal histones: the importance of folding intermediates. *J. Mol. Biol.* 342:247-260.
38. Bowie, J. U., and R. T. Sauer. 1989. Equilibrium dissociation and unfolding of the Arc repressor dimer. *Biochemistry.* 28:7139-7143.
39. Wales, T. E., J. S. Richardson, and M. C. Fitzgerald. 2004. Facile chemical synthesis and equilibrium unfolding properties of CopG. *Protein Sci.* 13:1918-1926.
40. Zeeb, M., G. Lipps, H. Lilie, and J. Balbach. 2004. Folding and association of an extremely stable dimeric protein from *Sulfolobus islandicus*. *J. Mol. Biol.* 336:227-240.
41. Liang, H., and T. C. Terwilliger. 1991. Reversible denaturation of the gene V protein of bacteriophage  $\phi$ 1. *Biochemistry.* 30:2772-2782.
42. Grant, S. K., I. C. Deckman, J. S. Culp, M. D. Minnich, I. S. Brooks, P. Hensley, C. Debouck, and T. D. Meek. 1992. Use of protein unfolding studies to determine the conformational and dimeric stabilities of HIV-1 and SIV proteases. *Biochemistry.* 31:9491-9501.
43. Varghese, L. T., R. K. Sinha, and J. Irudayaraj. 2008. Study of binding and denaturation dynamics of IgG and anti-IgG using dual color fluorescence correlation spectroscopy. *Anal. Chim. Acta.* 625:103-109.
44. Castro, M. J., and S. Anderson. 1996. Alanine point-mutations in the reactive region of bovine pancreatic trypsin inhibitor: effects on the kinetics and thermodynamics of binding to beta-trypsin and alpha-chymotrypsin. *Biochemistry.* 35:11435-11446.
45. Tello, D., E. Eisenstein, F. P. Schwarz, F. A. Goldbaum, B. A. Fields, R. A. Mariuzza, and R. J. Poljak. 1994. Structural and physicochemical analysis of the reaction between the anti-lysozyme antibody D1.3 and the anti-idiotopic antibodies E225 and E5.2. *J. Mol. Recognit.* 7:57-62.
46. Kelley, R. F., K. E. Costas, M. P. O'Connell, and R. A. Lazarus. 1995. Analysis of the factor VIIa binding site on human tissue factor: effects of tissue factor mutations on the kinetics and thermodynamics of binding. *Biochemistry.* 34:10383-10392.
47. Johanson, K., E. Appelbaum, M. Doyle, P. Hensley, B. Zhao, S. S. Abdel-Meguid, P. Young, R. Cook, S. Carr, and R. Matico. 1995. Binding interactions of human interleukin 5 with its receptor alpha subunit. Large scale production, structural, and functional studies of *Drosophila*-expressed recombinant proteins. *J. Biol. Chem.* 270:9459-9471.
48. Cunningham, B. C., and J. A. Wells. 1993. Comparison of a structural and a functional epitope. *J. Mol. Biol.* 234:554-563.
49. Wu, H., D. G. Myszka, S. W. Tendian, C. G. Brouillette, R. W. Sweet, I. M. Chaiken, and W. A. Hendrickson. 1996. Kinetic and structural analysis of mutant CD4 receptors that are defective in HIV gp120 binding. *Proc. Natl. Acad. Sci. USA.* 93:15030-15035.
50. Myszka, D. G., R. W. Sweet, P. Hensley, M. Brigham-Burke, P. D. Kwong, W. A. Hendrickson, R. Wyatt, J. Sodroski, and M. L. Doyle. 2000. Energetics of the HIV gp120-CD4 binding reaction. *Proc. Natl. Acad. Sci. USA.* 97:9026-9031.
51. Singha, N. C., A. Vlamis-Gardikas, and A. Holmgren. 2003. Real-time kinetics of the interaction between the two subunits, *Escherichia coli* thioredoxin and gene 5 protein of phage T7 DNA polymerase. *J. Biol. Chem.* 278:21421-21428.
52. Raman, C. S., R. Jemmerson, B. T. Nall, and M. J. Allen. 1992. Diffusion-Limited Rates for Monoclonal-Antibody Binding to Cytochrome-C. *Biochemistry.* 31:10370-10379.
53. Potempa, J., K. Kwon, R. Chawla, and J. Travis. 1989. Inter-alpha-trypsin inhibitor. Inhibition spectrum of native and derived forms. *J. Biol. Chem.* 264:15109-15114.
54. Nielsen, P. K., B. C. Bonsager, C. R. Berland, B. W. Sigurskjold, and B. Svensson. 2003. Kinetics and energetics of the binding between barley alpha-amylase/subtilisin inhibitor and barley alpha-amylase 2 analyzed by surface plasmon resonance and isothermal titration

- calorimetry. *Biochemistry*. 42:1478-1487.
55. Bowman, B. F., J. A. Peterson, and J. T. Stull. 1992. Pre-steady-state kinetics of the activation of rabbit skeletal muscle myosin light chain kinase by Ca<sup>2+</sup>/calmodulin. *J. Biol. Chem.* 267:5346-5354.
  56. England, P., F. Bregegere, and H. Bedouelle. 1997. Energetic and kinetic contributions of contact residues of antibody D1.3 in the interaction with lysozyme. *Biochemistry*. 36:164-172.
  57. Schreiber, G., and A. R. Fersht. 1993. Interaction of Barnase with Its Polypeptide Inhibitor Barstar Studied by Protein Engineering. *Biochemistry*. 32:5145-5150.
  58. Silversmith, R. E., M. D. Levin, E. Schilling, and R. B. Bourret. 2008. Kinetic characterization of catalysis by the chemotaxis phosphatase CheZ. Modulation of activity by the phosphorylated CheY substrate. *J. Biol. Chem.* 283:756-765.
  59. Xavier, K. A., S. M. McDonald, J. A. McCammon, and R. C. Willson. 1999. Association and dissociation kinetics of bobwhite quail lysozyme with monoclonal antibody HyHEL-5. *Protein Eng.* 12:79-83.
  60. Li, X. L., C. C. Fong, M. H. Huang, H. M. Cao, J. L. Zhao, and M. S. Yang. 2008. Measurement of binding kinetics between PI3-K and phosphorylated IGF-1R using a surface plasmon resonance biosensor. *Microchim. Acta.* 162:253-260.
  61. Fridmann, Y., G. Kafri, O. Danziger, and A. Horovitz. 2002. Dissociation of the GroEL-GroES asymmetric complex is accelerated by increased cooperativity in ATP binding to the GroEL ring distal to GroES. *Biochemistry*. 41:5938-5944.
  62. Murphy, A. J., F. Kemp, and J. Love. 2008. Surface plasmon resonance characterization of caldesmon-calmodulin binding kinetics. *Anal. Biochem.* 376:61-72.
  63. Razai, A., C. Garcia-Rodriguez, J. Lou, I. N. Geren, C. M. Forsyth, Y. Robles, R. Tsai, T. J. Smith, L. A. Smith, R. W. Siegel, M. Feldhaus, and J. D. Marks. 2005. Molecular evolution of antibody affinity for sensitive detection of botulinum neurotoxin type A. *J. Mol. Biol.* 351:158-169.
  64. Wu, H., D. S. Pfarr, Y. Tang, L. L. An, N. K. Patel, J. D. Watkins, W. D. Huse, P. A. Kiener, and J. F. Young. 2005. Ultra-potent antibodies against respiratory syncytial virus: effects of binding kinetics and binding valence on viral neutralization. *J. Mol. Biol.* 350:126-144.
  65. Solheim, S. A., E. Petsalaki, A. J. Stokka, R. B. Russell, K. Tasken, and T. Berge. 2008. Interactions between the Fyn SH3-domain and adaptor protein Cbp/PAG derived ligands, effects on kinase activity and affinity. *FEBS J.* 275:4863-4874.
  66. Swope, S. L., and R. L. Haganir. 1994. Binding of the nicotinic acetylcholine receptor to SH2 domains of Fyn and Fyk protein tyrosine kinases. *J. Biol. Chem.* 269:29817-29824.
  67. Rich, R. L., M. J. Cannon, J. Jenkins, P. Pandian, S. Sundaram, R. Magyar, J. Brockman, J. Lambert, and D. G. Myszka. 2008. Extracting kinetic rate constants from surface plasmon resonance array systems. *Anal. Biochem.* 373:112-120.
  68. Lambert, B., and M. Buckle. 2006. Characterisation of the interface between nucleophosmin (NPM) and p53: potential role in p53 stabilisation. *FEBS Lett.* 580:345-350.
  69. Spoerner, M., C. Herrmann, I. R. Vetter, H. R. Kalbitzer, and A. Wittinghofer. 2001. Dynamic properties of the Ras switch I region and its importance for binding to effectors. *Proc. Natl. Acad. Sci. USA.* 98:4944-4949.
  70. Curmi, P. A., S. S. Andersen, S. Lachkar, O. Gavet, E. Karsenti, M. Knossow, and A. Sobel. 1997. The stathmin/tubulin interaction in vitro. *J. Biol. Chem.* 272:25029-25036.
  71. Ishino, T., G. Pasut, J. Scibek, and I. Chaiken. 2004. Kinetic interaction analysis of human interleukin 5 receptor alpha mutants reveals a unique binding topology and charge distribution for cytokine recognition. *J. Biol. Chem.* 279:9547-9556.
  72. Abdiche, Y., D. Malashock, A. Pinkerton, and J. Pons. 2008. Determining kinetics and affinities of protein interactions using a parallel real-time label-free biosensor, the Octet. *Anal. Biochem.* 377:209-217.
  73. Keeler, C., E. M. Jablonski, Y. B. Albert, B. D. Taylor, D. G. Myszka, C. V. Clevenger, and

- M. E. Hodsdon. 2007. The kinetics of binding human prolactin, but not growth hormone, to the prolactin receptor vary over a physiologic pH range. *Biochemistry*. 46:2398-2410.
74. Zaccheo, O. J., S. N. Prince, D. M. Miller, C. Williams, C. F. Kemp, J. Brown, E. Y. Jones, L. E. Catto, M. P. Crump, and A. B. Hassan. 2006. Kinetics of insulin-like growth factor II (IGF-II) interaction with domain 11 of the human IGF-II/mannose 6-phosphate receptor: function of CD and AB loop solvent-exposed residues. *J. Mol. Biol.* 359:403-421.
75. Albeck, S., and G. Schreiber. 1999. Biophysical characterization of the interaction of the beta-lactamase TEM-1 with its protein inhibitor BLIP. *Biochemistry*. 38:11-21.
76. Wohlgemuth, S., C. Kiel, A. Kramer, L. Serrano, F. Wittinghofer, and C. Herrmann. 2005. Recognizing and defining true Ras binding domains I: biochemical analysis. *J. Mol. Biol.* 348:741-758.
77. Nakajima, H., L. Cocquerel, N. Kiyokawa, J. Fujimoto, and S. Levy. 2005. Kinetics of HCV envelope proteins' interaction with CD81 large extracellular loop. *Biochem. Biophys. Res. Commun.* 328:1091-1100.
78. Portmann, R., D. Magnani, J. V. Stoyanov, A. Schmechel, G. Multhaup, and M. Solioz. 2004. Interaction kinetics of the copper-responsive CopY repressor with the cop promoter of *Enterococcus hirae*. *J. Biol. Inorg. Chem.* 9:396-402.
79. Selve, N., and A. Wegner. 1987. pH-dependent rate of formation of the gelsolin-actin complex from gelsolin and monomeric actin. *Eur. J. Biochem.* 168:111-115.
80. Troeberg, L., M. Tanaka, R. Wait, Y. E. Shi, K. Brew, and H. Nagase. 2002. E. coli expression of TIMP-4 and comparative kinetic studies with TIMP-1 and TIMP-2: insights into the interactions of TIMPs and matrix metalloproteinase 2 (gelatinase A). *Biochemistry*. 41:15025-15035.
81. Martel, V., O. Filhol, A. Nueda, and C. Cochet. 2002. Dynamic localization/association of protein kinase CK2 subunits in living cells: a role in its cellular regulation? *Ann. N. Y. Acad. Sci.* 973:272-277.
82. Li, W., C. Zhang, J. Sui, J. H. Kuhn, M. J. Moore, S. Luo, S. K. Wong, I. C. Huang, K. Xu, N. Vasilieva, A. Murakami, Y. He, W. A. Marasco, Y. Guan, H. Choe, and M. Farzan. 2005. Receptor and viral determinants of SARS-coronavirus adaptation to human ACE2. *EMBO. J.* 24:1634-1643.
83. Kirby, I., R. Lord, E. Davison, T. J. Wickham, P. W. Roelvink, I. Kovesdi, B. J. Sutton, and G. Santis. 2001. Adenovirus type 9 fiber knob binds to the coxsackie B virus-adenovirus receptor (CAR) with lower affinity than fiber knobs of other CAR-binding adenovirus serotypes. *J. Virol.* 75:7210-7214.
84. Dooley, H., R. L. Stanfield, R. A. Brady, and M. F. Flajnik. 2006. First molecular and biochemical analysis of in vivo affinity maturation in an ectothermic vertebrate. *Proc. Natl. Acad. Sci. USA.* 103:1846-1851.
85. Malchiodi, E. L., E. Eisenstein, B. A. Fields, D. H. Ohlendorf, P. M. Schlievert, K. Karjalainen, and R. A. Mariuzza. 1995. Superantigen binding to a T cell receptor beta chain of known three-dimensional structure. *J. Exp. Med.* 182:1833-1845.
86. Wigelsworth, D. J., B. A. Krantz, K. A. Christensen, D. B. Lacy, S. J. Juris, and R. J. Collier. 2004. Binding stoichiometry and kinetics of the interaction of a human anthrax toxin receptor, CMG2, with protective antigen. *J. Biol. Chem.* 279:23349-23356.
87. Fleury, D., S. A. Wharton, J. J. Skehel, M. Knossow, and T. Bizebard. 1998. Antigen distortion allows influenza virus to escape neutralization. *Nat. Struct. Biol.* 5:119-123.
88. Lavergne, J. P., J. M. Jault, and A. Galinier. 2002. Insights into the functioning of *Bacillus subtilis* HPr kinase/phosphatase: affinity for its protein substrates and role of cations and phosphate. *Biochemistry*. 41:6218-6225.
89. Shimaoka, M., T. Xiao, J. H. Liu, Y. Yang, Y. Dong, C. D. Jun, A. McCormack, R. Zhang, A. Joachimiak, J. Takagi, J. H. Wang, and T. A. Springer. 2003. Structures of the alpha L I domain and its complex with ICAM-1 reveal a shape-shifting pathway for integrin regulation. *Cell.* 112:99-111.

90. Wyer, J. R., B. E. Willcox, G. F. Gao, U. C. Gerth, S. J. Davis, J. I. Bell, P. A. van der Merwe, and B. K. Jakobsen. 1999. T cell receptor and coreceptor CD8 alphaalpha bind peptide-MHC independently and with distinct kinetics. *Immunity*. 10:219-225.
91. Olson, M. W., D. C. Gervasi, S. Mobashery, and R. Fridman. 1997. Kinetic analysis of the binding of human matrix metalloproteinase-2 and -9 to tissue inhibitor of metalloproteinase (TIMP)-1 and TIMP-2. *J. Biol. Chem.* 272:29975-29983.
92. Lauwereys, M., M. Arbabi Ghahroudi, A. Desmyter, J. Kinne, W. Holzer, E. De Genst, L. Wyns, and S. Muyldermans. 1998. Potent enzyme inhibitors derived from dromedary heavy-chain antibodies. *EMBO J.* 17:3512-3520.
93. Monaco-Malbet, S., C. Berthet-Colominas, A. Novelli, N. Battai, N. Piga, V. Cheynet, F. Mallet, and S. Cusack. 2000. Mutual conformational adaptations in antigen and antibody upon complex formation between an Fab and HIV-1 capsid protein p24. *Structure*. 8:1069-1077.
94. Fierens, K., A. Gils, S. Sansen, K. Brijs, C. M. Courtin, P. J. Declerck, C. J. De Ranter, K. Gebruers, A. Rabijns, J. Robben, S. Campenhout, G. Volckaert, and J. A. Delcour. 2005. His374 of wheat endoxylanase inhibitor TAXI-I stabilizes complex formation with glycoside hydrolase family 11 endoxylanases. *FEBS J.* 272:5872-5882.
95. van der Merwe, P. A., A. N. Barclay, D. W. Mason, E. A. Davies, B. P. Morgan, M. Tone, A. K. Krishnam, C. Ianelli, and S. J. Davis. 1994. Human cell-adhesion molecule CD2 binds CD58 (LFA-3) with a very low affinity and an extremely fast dissociation rate but does not bind CD48 or CD59. *Biochemistry*. 33:10149-10160.
96. Maenaka, K., P. A. van der Merwe, D. I. Stuart, E. Y. Jones, and P. Sonderrmann. 2001. The human low affinity Fc gamma receptors IIa, IIb, and III bind IgG with fast kinetics and distinct thermodynamic properties. *J. Biol. Chem.* 276:44898-44904.
97. Tsiang, M., G. S. Jones, M. Hung, S. Mukund, B. Han, X. Liu, K. Babaoglu, E. Lansdon, X. Chen, J. Todd, T. Cai, N. Pagratis, R. Sakowicz, and R. Geleziunas. 2009. Affinities between the binding partners of the HIV-1 integrase dimer-lens epithelium-derived growth factor (IN dimer-LEDGF) complex. *J. Biol. Chem.* 284:33580-33599.
98. Jonsson, A., J. Dogan, N. Herne, L. Abrahmsen, and P. A. Nygren. 2008. Engineering of a femtomolar affinity binding protein to human serum albumin. *Protein. Eng. Des. Sel.* 21:515-527.
99. Baardsnes, J., C. S. Hinck, A. P. Hinck, and M. D. O'Connor-McCourt. 2009. TbetaR-II discriminates the high- and low-affinity TGF-beta isoforms via two hydrogen-bonded ion pairs. *Biochemistry*. 48:2146-2155.
100. Kellenberger, C., C. Boudier, I. Bermudez, J. G. Bieth, B. Luu, and H. Hietter. 1995. Serine protease inhibition by insect peptides containing a cysteine knot and a triple-stranded beta-sheet. *J. Biol. Chem.* 270:25514-25519.
101. Eggers, C. T., S. X. Wang, R. J. Fletterick, and C. S. Craik. 2001. The role of ecotin dimerization in protease inhibition. *J. Mol. Biol.* 308:975-991.
102. Presta, L., P. Sims, Y. G. Meng, P. Moran, S. Bullens, S. Bunting, J. Schoenfeld, D. Lowe, J. Lai, P. Rancatore, M. Iverson, A. Lim, V. Chisholm, R. F. Kelley, M. Riederer, and D. Kirchhofer. 2001. Generation of a humanized, high affinity anti-tissue factor antibody for use as a novel antithrombotic therapeutic. *Thromb. Haemost.* 85:379-389.
103. Nam, T. W., H. I. Jung, Y. J. An, Y. H. Park, S. H. Lee, Y. J. Seok, and S. S. Cha. 2008. Analyses of Mlc-IIBGlc interaction and a plausible molecular mechanism of Mlc inactivation by membrane sequestration. *Proc. Natl. Acad. Sci. USA.* 105:3751-3756.
104. Ardelt, W., and M. Laskowski, Jr. 1985. Turkey ovomucoid third domain inhibits eight different serine proteinases of varied specificity on the same ...Leu18-Glu19 ... reactive site. *Biochemistry*. 24:5313-5320.
105. Foote, J., and G. Winter. 1992. Antibody framework residues affecting the conformation of the hypervariable loops. *J. Mol. Biol.* 224:487-499.
106. Lan, K. L., H. Zhong, M. Nanamori, and R. R. Neubig. 2000. Rapid kinetics of regulator of



- G-protein signaling (RGS)-mediated Galphai and Galphao deactivation. Galpha specificity of RGS4 AND RGS7. *J. Biol. Chem.* 275:33497-33503.
107. Ying, Q. L., and S. R. Simon. 1993. Kinetics of the inhibition of human leukocyte elastase by elafin, a 6-kilodalton elastase-specific inhibitor from human skin. *Biochemistry.* 32:1866-1874.
  108. Wen, K. K., M. McKane, J. C. Houtman, and P. A. Rubenstein. 2008. Control of the ability of profilin to bind and facilitate nucleotide exchange from G-actin. *J. Biol. Chem.* 283:9444-9453.
  109. Radic, Z., P. D. Kirchhoff, D. M. Quinn, J. A. McCammon, and P. Taylor. 1997. Electrostatic influence on the kinetics of ligand binding to acetylcholinesterase. Distinctions between active center ligands and fasciculon. *J. Biol. Chem.* 272:23265-23277.
  110. Cederholm-Williams, S. A., F. De Cock, H. R. Lijnen, and D. Collen. 1979. Kinetics of the reactions between streptokinase, plasmin and alpha 2-antiplasmin. *Eur. J. Biochem.* 100:125-132.
  111. Stewart, R. C., and R. Van Bruggen. 2004. Association and dissociation kinetics for CheY interacting with the P2 domain of CheA. *J. Mol. Biol.* 336:287-301.
  112. Kannt, A. Y., S., Bendall, D.S. 1996. The role of acidic residues of plastocyanin in its interaction with cytochrome *f*. *Biochim. Biophys. Acta.* 1277:115-126.
  113. Jana, R., T. R. Hazbun, A. K. Mollah, and M. C. Mossing. 1997. A folded monomeric intermediate in the formation of lambda Cro dimer-DNA complexes. *J. Mol. Biol.* 273:402-416.
  114. Bajaj, K., G. Chakshumathi, K. Bachhawat-Sikder, A. Surolia, and R. Varadarajan. 2004. Thermodynamic characterization of monomeric and dimeric forms of CcdB (controller of cell division or death B protein). *Biochem. J.* 380:409-417.
  115. Talbott, M., M. Hare, A. Nyarko, T. S. Hays, and E. Barbar. 2006. Folding is coupled to dimerization of Tctex-1 dynein light chain. *Biochemistry.* 45:6793-6800.
  116. Schreiber, G., and A. R. Fersht. 1996. Rapid, electrostatically assisted association of proteins. *Nat. Struct. Biol.* 3:427-431.
  117. Venezia, C. F., B. J. Meany, V. A. Braz, and M. D. Barkley. 2009. Kinetics of Association and Dissociation of HIV-1 Reverse Transcriptase Subunits. *Biochemistry* 48:9084-9093.
  118. Meisner, W. K., and T. R. Sosnick. 2004. Fast folding of a helical protein initiated by the collision of unstructured chains. *Proc. Natl. Acad. Sci. USA.* 101:13478-13482.
  119. Kippen, A. D., and A. R. Fersht. 1995. Analysis of the Mechanism of Assembly of Cleaved Barnase from 2 Peptide-Fragments and Its Relevance to the Folding Pathway of Uncleaved Barnase. *Biochemistry.* 34:1464-1468.
  120. Reference deleted in proof
  121. Kiel, C., T. Selzer, Y. Shaul, G. Schreiber, and C. Herrmann. 2004. Electrostatically optimized Ras-binding Ral guanine dissociation stimulator mutants increase the rate of association by stabilizing the encounter complex. *Proc. Natl. Acad. Sci. USA.* 101:9223-9228.
  122. Kiefhaber, T., A. Bachmann, and K. S. Jensen. 2012. Dynamics and mechanisms of coupled protein folding and binding reactions. *Curr. Opin. Struct. Biol.* 22:21-29.
  123. Malatesta, F. 2005. The study of bimolecular reactions under non-pseudo-first order conditions. *Biophys. Chem.* 116:251-256.
  124. Chi, C. N., A. Engstrom, S. Gianni, M. Larsson, and P. Jemth. 2006. Two conserved residues govern the salt and pH dependencies of the binding reaction of a PDZ domain. *J. Biol. Chem.* 281:36811-36818.
  125. Onitsuka, M., H. Kamikubo, Y. Yamazaki, and M. Kataoka. 2008. Mechanism of induced folding: Both folding before binding and binding before folding can be realized in staphylococcal nuclease mutants. *Proteins.* 72:837-847.
  126. Milla, M. E., and R. T. Sauer. 1994. P22 Are Repressor - Folding Kinetics of a Single-Domain, Dimeric Protein. *Biochemistry.* 33:1125-1133.

127. Wendt, H., L. Leder, H. Harma, I. Jelesarov, A. Baici, and H. R. Bosshard. 1997. Very rapid, ionic strength-dependent association and folding of a heterodimeric leucine zipper. *Biochemistry*. 36:204-213.
